# Supplementary material for: Intracellular Proton Access in a Cl−/H+ Antiporter
Source: PLOS journal article supplement (doi:10.1371/journal.pbio.1001441), 2012-12-11
Supplement: S3 (10.1371/journal.pbio.1001441.s003) [file journal.pbio.1001441.s003]

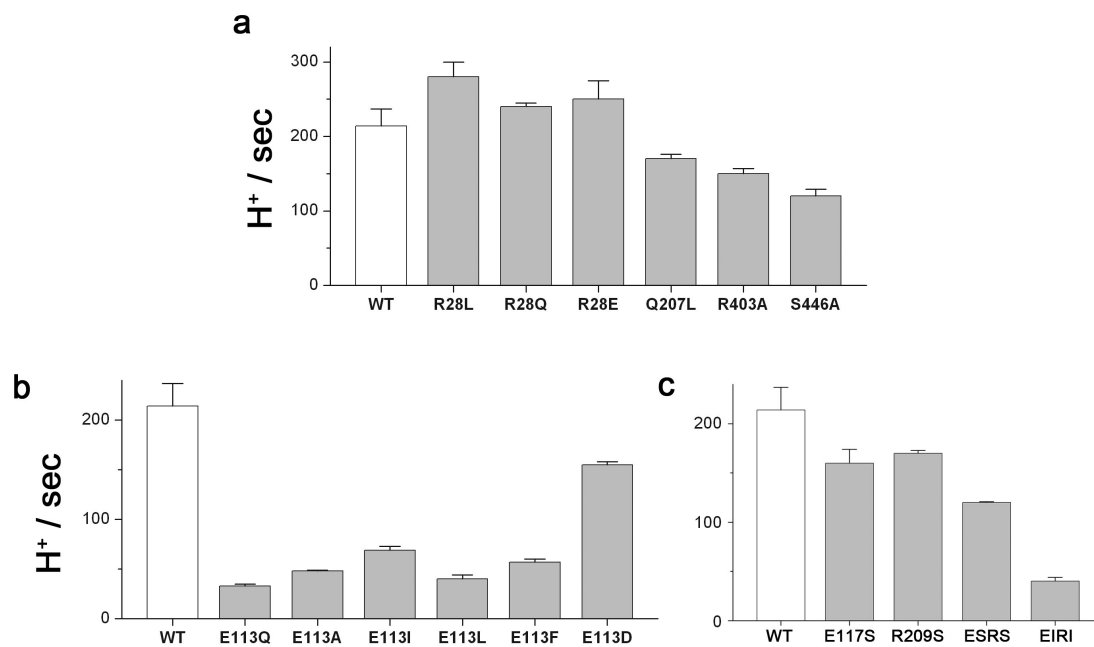

**Figure S3.** Effect of mutations on residues lining the polar pathway.

Proton transport activities from each mutant CLC-ec1 was measured from reconstituted proteoliposomes as described in main text.
