# Supplementary material for: Intracellular Proton Access in a Cl−/H+ Antiporter
Source: PLOS journal article supplement (doi:10.1371/journal.pbio.1001441), 2012-12-11
Supplement: S5 (10.1371/journal.pbio.1001441.s005) [file journal.pbio.1001441.s005]

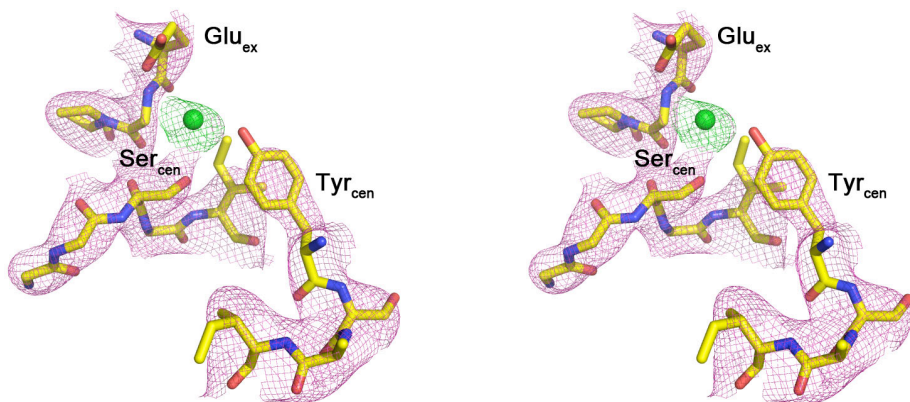

**Figure S5.** Stereo view of E202Y mutant near Cl<sup>-</sup> binding site.

Cl<sup>-</sup> ion bound in Cl<sub>cen</sub> is shown in green. 2F<sub>o</sub>-F<sub>c</sub> map is contoured at 1.0σ.
